1 **Does skin surface temperature variation account for Buruli ulcer**  
2 **lesion distribution?**

3 Nicola K. Sexton-Oates<sup>1,2\*</sup>, Andrew J. Stewardson<sup>3</sup>, Arvind Yerramilli<sup>4</sup>, Paul D.R.  
4 Johnson<sup>2\*</sup>

5  
6 <sup>1</sup>Department of Medicine, the University of Melbourne, Melbourne, Victoria, Australia

7 <sup>2</sup>Department of Infectious Diseases, Austin Health, Melbourne, Victoria, Australia

8 <sup>3</sup>Department of Infectious Diseases, Alfred Hospital and Central Clinical School,  
9 Monash University, Melbourne, Victoria, Australia

10 <sup>4</sup>Department of General Medicine, the Royal Melbourne Hospital, Melbourne,  
11 Victoria, Australia

12

13 \*Corresponding authors

14 [nicola.sexton-oates@austin.org.au](mailto:nicola.sexton-oates@austin.org.au) (NKSO)

15 [paul.johnson@austin.org.au](mailto:paul.johnson@austin.org.au) (PDRJ)

16

17

18

19

20

21

22

23

24

25

26

27

28

29

30

31

32

33

34

35

36

## 37 **Abstract**

### 38 **Background**

39 Buruli ulcer is a necrotising infection of skin and soft tissue caused by  
40 *Mycobacterium ulcerans* (*M. ulcerans*). Buruli ulcer most often occurs on limbs, and  
41 it is hypothesized this is explained by direct exposure to the environment. However,  
42 even on exposed areas Buruli ulcer is not randomly distributed. *M. ulcerans* prefers  
43 an in vitro temperature of 30-33°C and growth is inhibited at higher temperatures.  
44 This study investigated whether variations in skin surface temperature distribution in  
45 healthy volunteers could partly account for Buruli ulcer lesion distribution.

46

### 47 **Methodology/Principal Findings**

48 In this observational study, a thermal camera (FLIR E8) was used to measure skin  
49 surface temperature at the sternal notch and at 44 predetermined locations on the  
50 limbs of 18 human participants. Body locations of high, middle and low Buruli ulcer  
51 incidence were identified from existing density maps of lesion distribution. Skin  
52 temperature of the three incidence location groups were compared, and differences  
53 in age and sex groups were also analysed.

54

55 We found an inverse relationship between skin temperature and lesion distribution,  
56 where high incidence locations were significantly cooler and low incidence locations  
57 significantly warmer (Kruskal-Wallis test  $p < 0.0001$ ). Linear mixed effects regression  
58 analysis estimated that skin surface temperature accounts for 9.5% of the variance  
59 in Buruli ulcer lesion distribution (marginal R-squared = 0.095). Men had warmer  
60 upper and lower limbs than females (Mann-Whitney U test  $p = 0.0003$  and  $p < 0.0001$   
61 respectively).

## 62 **Conclusions/Significance**

63 We have found an inverse relationship between skin temperature and Buruli ulcer  
64 lesion distribution, however this association is weak. Additional unknown factors are  
65 likely to be involved that explain the majority of the variation in Buruli lesion  
66 distribution.

67

## 68 **Author Summary**

69 Buruli ulcer is a destructive soft tissue infection caused by the bacterium  
70 *Mycobacterium ulcerans*. The precise mode of transmission remains unknown. One  
71 theory proposes that transmission occurs by direct contact with a contaminated  
72 environment. Lesions occur mostly on limbs, and it is hypothesized this is explained  
73 by direct exposure to the environment. However even on exposed areas, lesions are  
74 not randomly distributed. This study investigated whether skin surface temperature  
75 can partly explain Buruli ulcer lesion distribution. We measured the skin surface  
76 temperature of 18 healthy participants using a thermal camera and compared  
77 temperature distribution to the distribution of Buruli ulcer lesions investigated in a  
78 previously published study. We found that there is a negative correlation between  
79 skin temperature and Buruli ulcer lesion incidence. However, the association is weak  
80 and other factors e.g. clothing choice and insect biting patterns may explain the  
81 majority of Buruli ulcer lesion distribution.

82

83

84

85

86

## 87 **Introduction**

88 Buruli ulcer is a necrotising cutaneous infection caused by the bacterium  
89 *Mycobacterium ulcerans* [1, 2]. Cases of Buruli ulcer have been reported in 33  
90 countries, most of which are located in West and Central Africa [3], with children in  
91 these areas experiencing the majority of the disease burden [1]. Currently, there is a  
92 major outbreak occurring in south-eastern Australia on the Bellarine and Mornington  
93 peninsulas [4, 5]. Severe and/or untreated Buruli ulcer may result in contractures,  
94 deformity, permanent scarring, amputations and disabilities [6]. These can lead to  
95 social, educational and financial difficulties for those affected and their families,  
96 particularly in developing countries with limited access to modern therapy [7].  
97 Seventy years on since the identification of *M. ulcerans* as the causative organism of  
98 Buruli ulcer, its transmission remains controversial. The disease only occurs in  
99 specific endemic locations but how exactly the infection is acquired in these regions  
100 is undetermined [5, 6].

101 There are several competing hypotheses concerning the transmission of *M.*  
102 *ulcerans*. Firstly, transmission may occur through direct contact with an environment  
103 contaminated with *M. ulcerans*, likely aided by minor cuts and abrasions sustained  
104 while working or playing outdoors [6]. Secondly, in south-eastern Australia there is  
105 increasing evidence that insects, particularly mosquitoes, may act as mechanical  
106 vectors to transmit the bacteria to humans [6]. Thirdly, *M. ulcerans* may be  
107 aerosolised from contaminated natural bodies of water, spread into the environment,  
108 then be inhaled and disseminated in the body [8]. The bacteria could then reactivate  
109 at cooler body sites [8, 9] as *M. ulcerans* prefers to grow in vitro at 30-33°C and  
110 growth is inhibited at higher temperatures [6], in a way analogous to *Mycobacterium*

111 *leprae*, the causative organism of leprosy [10]. Human-to-human transmission is not  
112 thought to be of public health significance [11].

113 Buruli ulcer lesions are most common on limbs [1, 9, 12-16]. We postulate that skin  
114 on these areas of the body is more likely to be exposed to a contaminated  
115 environment than other areas of the body, for example the trunk. Recently,  
116 computer-generated density maps of Buruli ulcer lesion distribution have been  
117 created by analysing the locations of 649 confirmed lesions in Victoria, Australia from  
118 1998-2015 [9]. A highly non-random distribution was found, favouring distal limbs,  
119 particularly ankles, calves and elbows. Palms of the hands and soles of the feet were  
120 rarely affected. These findings are in keeping with the mosquito vector and direct  
121 contamination hypotheses of transmission, as most lesions occurred on commonly  
122 exposed areas of the body (i.e. limbs). However, palms of the hand and soles of the  
123 feet are rarely sites of Buruli ulcer lesions. This suggests an additional factor or  
124 factors are involved in the localisation of lesions beyond just direct environmental  
125 contact. For example, trauma, insect bites, or the preference of *M. ulcerans* to grow  
126 at cooler body sites [9]. This study aimed to investigate whether skin surface  
127 temperature distribution can explain variation in Buruli ulcer incidence in different  
128 regions of the body and between different demographics (i.e. age and sex  
129 categories).

130

131

132

133

134

135

## 136 **Methods**

### 137 **Study design**

138 This was an observational study using thermal imaging to investigate skin surface  
139 temperature in volunteer participants and enable comparison to published Buruli  
140 ulcer lesion distribution data. Measurements were undertaken in a single visit per  
141 participant at the Austin Hospital between April and June 2018. Eighteen volunteer  
142 participants were included in this study, recruited in age group cohorts:  $\leq 15$  (n=2),  
143 16-64 (n=12) and  $\geq 65$  years of age (n=4). This was to allow for comparison to  
144 published density maps of Buruli ulcer lesion distribution also categorised in these  
145 age groups. We aimed to recruit approximately 20 patients across the three age  
146 groups, based partly on time and resource availability. At the time the project was  
147 designed we were not aware of existing data on which to base a formal power  
148 calculation. We successfully recruited and studied 18 patients. We recruited a  
149 convenience sample of hospital staff, medical students, and family and friends of  
150 initial participants. Eligibility criteria included the ability to stand for 30 minutes and to  
151 be afebrile ( $<38^{\circ}\text{C}$ ) on the day of measurement.

152

### 153 **Data collection**

154 A thermal camera (FLIR E8) was obtained to measure skin surface temperature from  
155 a distance of 30cm at the sternal notch and at 44 predetermined locations on the  
156 limbs (see Appendix 1 and 2). The thermal camera used in this study had spatial  
157 resolution identified as sufficient for the evaluation of human skin temperature [17],  
158 and the lead researcher attended a 4 hour training course provided by the  
159 manufacturer (FLIR Systems, 18/03/2018). We measured locations specifically on

160 the limbs as these areas are commonly affected by Buruli ulcer and postulated to be  
161 commonly exposed to the environment. However within these exposed areas there  
162 is variation in lesion prevalence, and so by measuring relative temperature at  
163 different limb locations we investigated whether this variation may explain the known  
164 non-random distribution of Buruli lesions. A measurement at the sternal notch was  
165 included to enable comparison of limb measurements to the trunk and hence  
166 comparison of our findings to previous research examining limb and trunk skin  
167 temperatures. Measurements were recorded in clinic rooms at the Austin Hospital to  
168 minimise variation in room temperature and surrounding surfaces, as these can  
169 affect skin surface temperature and thermal camera measurements. Two  
170 temperatures were recorded for each location, measured approximately 15 minutes  
171 apart. Thermal images of upper and lower limbs were also recorded from 1.5 and 3  
172 metres.

173 Participants rested in the clinic room for approximately 10 minutes prior to  
174 measurement to minimise the effect of prior physical activity on skin surface  
175 temperature distribution. Participants also completed a questionnaire regarding age,  
176 sex and a number of medical conditions/medications known to affect skin surface  
177 temperature (see Appendix 3). Room temperature was recorded using Aqua  
178 Systems 'Wooden Wall Thermometer'. Core body temperature was measured using  
179 a temporal artery thermometer (Exergen TAT-5000) to ensure participants were  
180 afebrile. Core body temperature, sternal notch and left cubital fossa temperature  
181 measurements of a control, the investigator, were recorded at each session to  
182 examine the consistency of skin surface temperature measurements over time and  
183 with varying room and core body temperatures.

184

185 **Categorisation of body locations of high, medium and low Buruli ulcer**  
186 **incidence**

187 Previously published density maps of Buruli ulcer lesion distribution (Fig 1) were  
188 created using a 15-layer colour ramp from green (lowest density, 1/15) to red  
189 (highest density, 15/15) as per the first author of the publication. Using these  
190 published maps, density gradations were assigned to the body locations investigated  
191 in this study (Table 1).

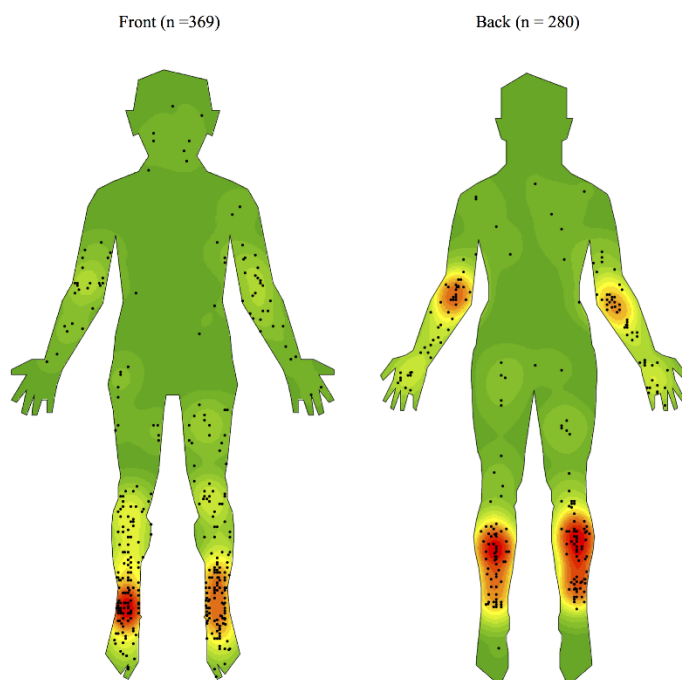

192  
193 **Fig 1. Density map of the distribution of Buruli ulcer lesions on front and back**  
194 **of human body templates generated using ArcGIS software version 10.3.1. [9]**  
195

196  
197  
198  
199  
200  
201  
202



203 **Table 1. Body locations with corresponding Buruli ulcer lesion density**  
204 **gradations, categorised into high, medium and low Buruli ulcer incidence**  
205 **groups.**

206

| Location                             | Density gradation |
|--------------------------------------|-------------------|
| <b>High Buruli ulcer incidence</b>   |                   |
| Posterior upper calf                 | 8-14              |
| Posterior mid calf                   | 14-15             |
| Posterior lower calf                 | 7-12              |
| Anterior lower shin                  | 8-15              |
| Medial malleolus                     | 10-13             |
| Lateral malleolus                    | 10-15             |
| Elbow                                | 10-12             |
| <b>Medium Buruli ulcer incidence</b> |                   |
| Dorsum of hand                       | 5-7               |
| Posterior mid forearm                | 6-7               |
| Dorsum of foot                       | 7-9               |
| Anterior upper shin                  | 5-7               |
| Anterior mid shin                    | 7-9               |
| Anterior knee                        | 6-7               |
| <b>Low Buruli ulcer incidence</b>    |                   |
| Posterior mid arm                    | 3-4               |
| Posterior mid thigh                  | 2-3               |
| Popliteal fossa                      | 3-5               |
| Sole of foot                         | 1                 |
| Sternal notch                        | 1                 |
| Anterior mid thigh                   | 1-3               |
| Central palm                         | 1-2               |
| Anterior mid forearm                 | 2-3               |
| Cubital fossa                        | 5                 |
| Anterior mid arm                     | 3-4               |

207  
208 Body locations of high Buruli ulcer incidence for this study have been defined as  
209 areas of lesion density in the highest third of density gradations, corresponding to  
210 gradations  $\geq 11/15$ . Body locations of medium Buruli ulcer incidence have been  
211 defined as areas of lesion density in the middle third of density gradations,  
212 corresponding to gradations 6-10/15. Body locations of low Buruli ulcer incidence  
213 have been defined as areas with density gradation 1-5/15. If a location had a range

214 of density gradations, the highest gradation was used to determine Buruli ulcer  
215 incidence category.

216

## 217 **Statistical analysis**

218 The mean skin surface temperature of each body location was compared to the  
219 mean of all other locations combined using Mann-Whitney *U* tests. The median  
220 temperatures of the three Buruli ulcer incidence groups were compared using a  
221 Kruskal-Wallis test. Differences in age and sex groups were also analysed using  
222 Kruskal-Wallis and Mann-Whitney *U* tests.

223 Additionally, we built a mixed-effects linear regression model using to quantify the  
224 association between temperature and incidence of Buruli ulcer in each body location.  
225 We accounted for the repeated temperature measurements by including random  
226 effects for participant (random intercept and slope) and for the potential impact of  
227 age by including a random slope for age.

228 The regression model was built using R, version 3.4.4 (R Foundation for Statistical  
229 Computing, Vienna, Austria). All other analyses were performed using GraphPad  
230 Prism® version 7.04.

231

## 232 **Ethical statement**

233 This study was approved by the Austin Health Human Research Ethics Committee.  
234 Reference number: HREC/17/Austin/578. Written consent was obtained from each  
235 participant.

236

## 237 **Results**

### 238 **Participant cohort analysis**

239 Eighteen participants were included. The mean age was 38.7 years (range = 11.8-  
240 77.3, IQR = 24.7-64.4). Nine participants were male (50%) and 9 female (50%). In  
241 the  $\leq 15$  years age group (n=2), there were 2 (100%) female participants. In the 16-  
242 64 years age group (n=12), there were 6 (50%) females and 6 (50%) males. In the  $\geq$   
243 65 years age group (n=4), there was 1 (25%) female and 3 (75%) males.

244 Of the 18 participants, 4 (22%) reported having experienced Chilblains, 1 (6%)  
245 peripheral vascular disease, 1 (6%) suspected Raynaud's phenomenon, 1 (6%) low-  
246 functioning thyroid on thyroxine with normal TSH (thyroid-stimulating hormone)  
247 levels, and 1 (6%) taking a blood pressure medication (Irbesartan). No participants  
248 reported having diabetes for  $> 5$  years, a high-functioning thyroid, neuropathy,  
249 sunburn or taking migraine medication.

250

### 251 **Grouping of left and right measurements**

252 With the exception of the sternal notch, measurements were recorded on both sides  
253 of the body for each location, e.g. left anterior knee and right anterior knee. As there  
254 was no significant difference between left and right measurements by Mann-Whitney  
255 *U* test ( $p=0.4844$ ), these groups were combined to give 23 body locations for  
256 reporting of mean skin surface temperature and further analysis.

257

258

259 **Mean skin surface temperature in high, medium and low Buruli ulcer incidence**  
260 **locations**

261 Participant skin surface temperature measurements ranged from 22.6 to 35.3°C, with  
262 a mean of 30.1°C (Table 2). Skin surface temperature data was not normally  
263 distributed (D'Agostino-Pearson normality test  $p < 0.0001$ ). Cubital fossa was the  
264 location of highest mean skin surface temperature (33.2°C) and sole of foot the  
265 location of lowest mean skin surface temperature (27.7°C) (Table 2 and Fig 2).  
266 Overall, the three incidence groups were found to have significantly different median  
267 temperatures (Kruskal-Wallis test  $p < 0.0001$ ). The high incidence group was the  
268 coolest, the low incidence group the warmest, and the medium incidence group fell  
269 in between (median 29.3, 31.1 and 30.6°C respectively). This is reflected in figures 2  
270 and 3, which show a visually-apparent negative correlation between Buruli ulcer  
271 incidence and mean skin surface temperature. This is supported by linear mixed  
272 effects regression analysis, which estimates that skin surface temperature accounts  
273 for 9.5% of the variance in Buruli ulcer lesion distribution (marginal R-squared =  
274 0.095). Additionally, for each one degree (Celsius) increase in the temperature of a  
275 body location there is a 0.59 (95% CI, 0.78–0.41) reduction in incidence category of  
276 that part of the body.

277

278

279

280

281

282

283

284

285 **Table 2. Mean and range of temperature recordings.**

| <b>Measurement</b>                      | <b>Mean (°C)</b> | <b>Range (°C)</b> |
|-----------------------------------------|------------------|-------------------|
| <b>Anterior and Posterior Locations</b> | 30.1             | 22.6-35.3         |
| <b>Anterior Locations</b>               |                  |                   |
| Sternal notch                           | 33.1             | 30.7-34.5         |
| Central palm                            | 31.4             | 25.4-35.2         |
| Mid forearm                             | 31.6             | 30.0-33.9         |
| Cubital fossa                           | 33.2             | 31.1-35.3         |
| Mid arm                                 | 31.5             | 29.2-33.4         |
| Dorsum of foot                          | 30.1             | 23.8-35.0         |
| Medial malleolus                        | 29.0             | 24.7-32.2         |
| Lower shin                              | 29.4             | 26.6-32.0         |
| Mid shin                                | 30.9             | 28.5-32.9         |
| Upper shin                              | 31.0             | 27.5-32.9         |
| Knee                                    | 28.0             | 25.0-32.1         |
| Mid thigh                               | 29.7             | 26.7-32.8         |
| <b>Posterior Locations</b>              |                  |                   |
| Dorsum of hand                          | 29.8             | 25.7-34.7         |
| Mid forearm                             | 31.2             | 29.0-33.6         |
| Elbow                                   | 29.3             | 27.0-32.0         |
| Mid arm                                 | 29.6             | 27.4-32.2         |
| Sole of foot                            | 27.7             | 22.6-32.7         |
| Lateral malleolus                       | 28.3             | 24.2-32.0         |
| Lower calf                              | 28.8             | 25.8-31.6         |
| Mid calf                                | 29.7             | 26.2-32.4         |
| Upper calf                              | 29.8             | 27.1-32.5         |
| Popliteal fossa                         | 31.0             | 28.1-32.9         |
| Mid thigh                               | 30.2             | 26.8-32.8         |
| <b>Additional Measurements</b>          |                  |                   |
| Control sternal notch                   | 33.9             | 32.5-35.3         |
| Control left cubital fossa              | 33.7             | 32.5-34.7         |
| Control core body temperature           | 36.6             | 36.3-36.9         |
| Room temperature                        | 21.1             | 20.0-25.0         |
| Participant core body temperature       | 36.5             | 36.0-37.0         |

286

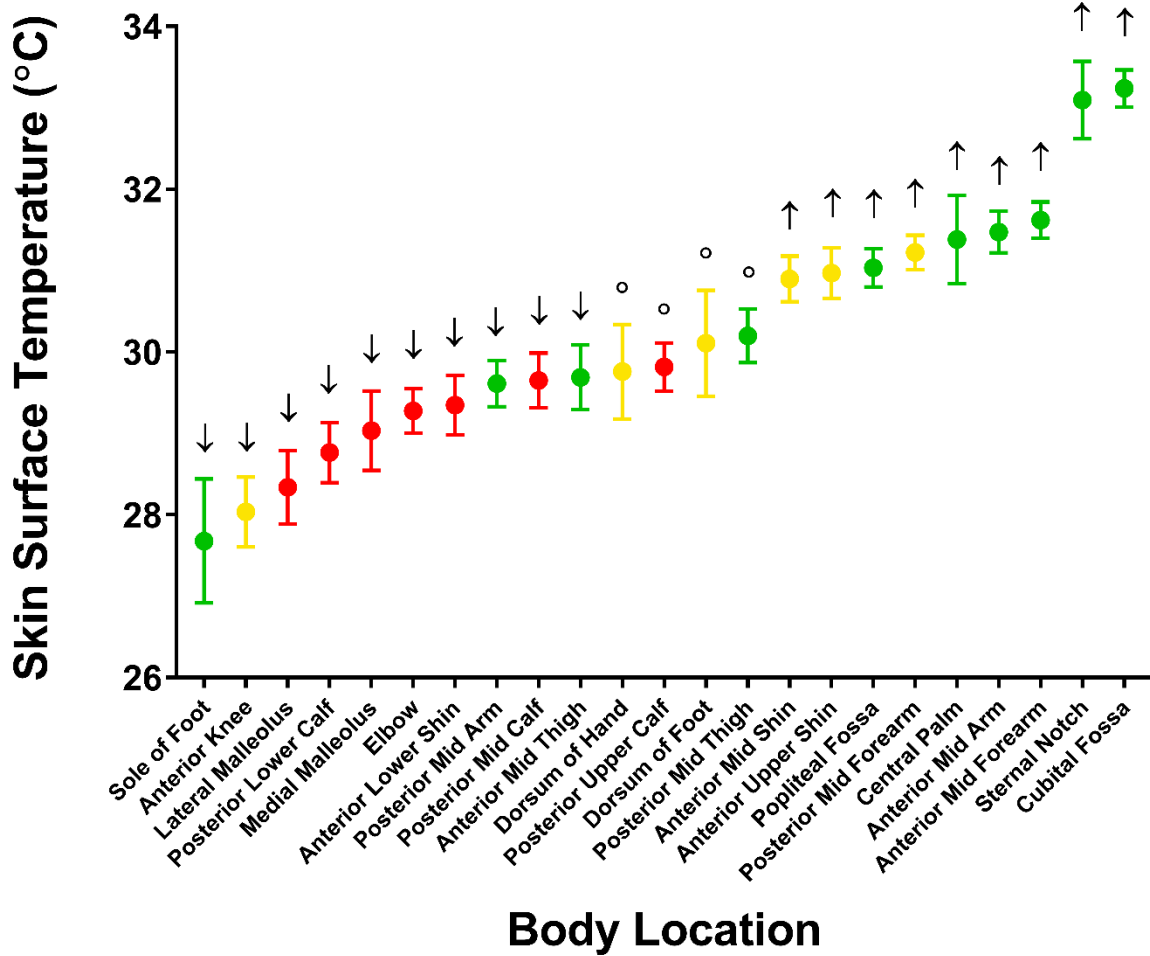

- High Buruli ulcer incidence location
- Medium Buruli ulcer incidence location
- Low Buruli ulcer incidence location
- ↑ Significantly higher than the mean of all other locations combined
- ↓ Significantly lower than the mean of all other locations combined
- Not significantly different from the mean of all other locations combined

287

288 **Fig 2. Mean skin surface temperature with 95% CI for each body location.**  
 289 Results of comparison to mean skin surface temperature of all other locations  
 290 combined by Mann-Whitney *U* test are also shown (p values from left to right:  
 291  $p < 0.0001$ ,  $p = 0.0003$ ,  
 292  $p = 0.0033$ ,  $p = 0.0119$ ,  $p = 0.0293$ ,  $p = 0.125$ ,  $p = 0.0601$ ,  $p = 0.8182$ ,  $p = 0.9846$ ,  $p = 0.0008$ ,  
 293  $p = 0.0005$ ,  $p < 0.0001$ ,  
 294  $p < 0.0001$ )

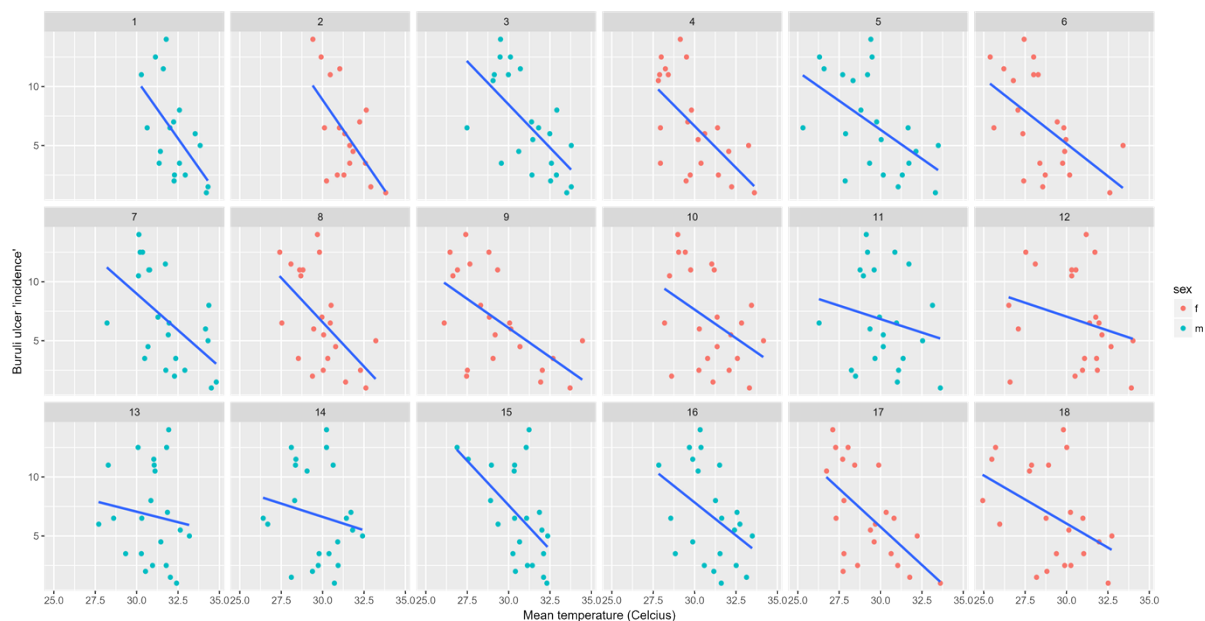

295

296 **Fig 3. Scatterplot of mean temperature and Buruli ulcer incidence gradation for**  
297 **each body location, overlaid by a line of best fit. Each participant's data**  
298 **shown separately. The data points for the location 'sole of foot' have been excluded.**

299

300 With respect to the 7 high Buruli ulcer incidence locations, 6 (86%) had mean skin  
301 surface temperature significantly lower than the mean of all other locations combined  
302 when testing with Mann-Whitney U tests (Fig 2). These locations were elbow,  
303 anterior lower shin, lateral malleolus, medial malleolus, posterior lower calf and  
304 posterior mid calf. One (14%) high Buruli ulcer incidence location, posterior upper  
305 calf, did not have mean temperature significantly different from the mean of all other  
306 locations combined. No high Buruli ulcer incidence locations had mean temperatures  
307 significantly higher than the mean of all other locations combined. Notably, two low  
308 incidence locations were also within the same temperature range as high lesion  
309 density locations; anterior mid thigh and posterior mid arm.

310

### 311 **Comparison by age group and sex**

312 Analysis of skin surface temperatures by sex and age group are shown in Table 3.

313 All male and all female measurements were compared using a Mann-Whitney U test.

314 The male group had a significantly higher skin surface temperature overall than the  
 315 female group ( $p < 0.0001$ ), with a mean of  $30.6^{\circ}\text{C}$  compared to  $29.6^{\circ}\text{C}$  respectively.  
 316 When comparing all upper limb measurements, males had a significantly higher  
 317 mean skin surface temperature than females ( $31.5$  and  $30.8^{\circ}\text{C}$  respectively,  
 318  $p = 0.0003$ ). When comparing all lower limb measurements, males also had a  
 319 significantly higher mean skin surface temperature than females ( $30.2$  and  $28.9^{\circ}\text{C}$   
 320 respectively,  $p < 0.0001$ ).

321 The skin surface temperature measurements of the three age groups were  
 322 compared using a Kruskal-Wallis test and found to be significantly different  
 323 ( $p < 0.0001$ ). The  $\leq 15$  age group had an overall mean skin surface temperature of  
 324  $28.1^{\circ}\text{C}$  (range  $23$ - $33.6$ ), the  $16$ - $64$  age group  $30.3^{\circ}\text{C}$  (range  $24$ - $35.3$ ) and the  $\geq 65$   
 325 age group  $30.3^{\circ}\text{C}$  (range  $22.6$ - $34.7$ ). However, these data should be considered with  
 326 caution as we were only able to recruit 2 participants for the  $\leq 15$  age group.

327 To enable comparison to previously published work, anterior and posterior mid arm  
 328 temperatures combined were compared between those  $< 65$  years and those  $\geq 65$   
 329 years. No significant difference was found by Mann-Whitney  $U$  test ( $p = 0.433$ , means  
 330  $30.59$  and  $30.37^{\circ}\text{C}$  respectively).

331

332 **Table 3. Comparison of mean skin surface temperature by age group and sex.**

| Location      | Mean skin temperature ( $^{\circ}\text{C}$ ) |             |                 | p value                     |
|---------------|----------------------------------------------|-------------|-----------------|-----------------------------|
|               | Male                                         | Female      |                 |                             |
| All locations | 30.6                                         | 29.6        |                 | $< 0.0001$ (Mann-Whitney U) |
| Upper limb    | 31.5                                         | 30.8        |                 | 0.0003 (Mann-Whitney U)     |
| Lower limb    | 30.2                                         | 28.9        |                 | $< 0.0001$ (Mann-Whitney U) |
|               | $\leq 15$ years                              | 16-64 years | $\geq 65$ years |                             |
| All locations | 28.1                                         | 30.3        | 30.3            | $< 0.0001$ (Kruskal-Wallis) |
|               | $< 65$ years                                 |             | $\geq 65$ years |                             |
| Mid arm       | 30.6                                         |             | 30.4            | 0.433 (Mann-Whitney U)      |

333



## 334 **Control measurements**

335 Measurements of the constant control's core body temperature, sternal notch and  
336 left cubital fossa skin temperature varied throughout the data collection period (see  
337 Table 1). Sternal notch ranged from 32.5-35.3°C, left cubital fossa 32.5-34.7°C, and  
338 core body temperature 36.3-36.9°C. The constant control was taking the oral  
339 contraceptive pill during the measurement period and so menstrual cycle hormonal  
340 changes were not expected to affect core body temperature.

341

## 342 **Discussion**

343 We have found that overall, the three Buruli ulcer incidence location groups derived  
344 from previously published work had significantly different median skin surface  
345 temperatures. The highest incidence group had the coolest median temperature, the  
346 lowest incidence group had the highest median temperature, and the middle  
347 incidence group fell in between. In addition, the linear mixed effects regression  
348 analysis estimated that skin surface temperature accounts for 9.5% of the variance  
349 in Buruli ulcer lesion distribution (marginal R-squared = 0.095). This generally  
350 supports a previously stated hypothesis that Buruli ulcer lesions occur preferentially  
351 on areas of relatively lower skin temperature. However, two low incidence areas  
352 (anterior mid thigh and posterior mid arm) were within the same skin surface  
353 temperature range as the high incidence group. Additionally the coolest region of all,  
354 sole of foot, is rarely affected by Buruli ulcer.

355 Buruli ulcer lesion distribution has been found to differ between men and women,  
356 and between age groups. For example, men have been found to be more likely than  
357 females to have lesions on upper limbs, and less likely to have lesions on lower

358 limbs [9, 15]. Those  $\geq 65$  years of age have been found to be less likely to have a  
359 lesion on the arm and shoulder than those  $< 65$  [9]. We investigated whether these  
360 differences between age and sex correlated with differences in skin surface  
361 temperature distribution. We found that men had significantly higher skin surface  
362 temperatures than females for both upper and lower limbs. There was no significant  
363 difference in mid arm measurements found between those  $< 65$  and those  $\geq 65$ . As  
364 such, we conclude that differences in skin surface temperature distribution found in  
365 this study do not account for differences in Buruli ulcer lesion distribution between  
366 age and sex groups.

367 Our findings add some support to the aerosol-dissemination and reactivation  
368 hypothesis of transmission as we found a negative correlation between skin surface  
369 temperature and Buruli ulcer lesion distribution. However, the association is weak  
370 and there are important exceptions (e.g. sole of foot) where the relationship breaks  
371 down. With respect to the mosquito vector hypothesis, skin temperature may  
372 influence mosquito biting patterns and hence Buruli ulcer lesion distribution. A future  
373 direction of research may be the direct investigation of the biting patterns of  
374 mosquitoes, particularly of species hypothesised to mechanically transmit *M.*  
375 *ulcerans* in south-eastern Australia.

376 To our knowledge, the skin surface temperatures of high, medium and low Buruli  
377 ulcer incidence lesion locations have not been previously studied. Several studies  
378 have examined skin temperature distribution more generally and found that the trunk  
379 is warmer than limbs, and proximal areas of limbs warmer than distal areas [18, 19].  
380 The results from this study are consistent with these observations, finding that the  
381 sternal notch on the trunk had a mean skin surface temperature higher than 21 of 22  
382 measured limb locations. In addition, the mean foot measurements were colder than

383 mean mid thigh measurements, and the mean dorsal hand temperature was colder  
384 than mean posterior mid arm. In contrast, the mean temperature for palm of hand  
385 was warmer than that of the anterior mid arm.

386 The validity of thermal camera measurements and control of the factors which may  
387 influence them are important to consider. Thermal cameras have been used to  
388 record skin surface temperature in both disease and non-disease states [20]. We  
389 have used a thermal camera identified as appropriate for clinical research in humans  
390 [17], and believe our method of measurement (on-the-spot readings from a distance  
391 of 30cm, as opposed to taking measurements from a thermal image at a greater  
392 distance using a software program) optimises the validity and consistency of  
393 temperature readings. This conclusion draws from the training course run by FLIR  
394 Systems. Surfaces within the room and properties of the measured surface (in this  
395 case, skin) affect thermal camera measurements [21]. We controlled these variables  
396 by adjusting the thermal camera emissivity setting to 0.98, appropriate for human  
397 skin [21], and conducting the measurements in clinic rooms at the Austin hospital  
398 containing similar surfaces.

399 Limitations of this study include the fact that specific points were used to represent  
400 temperature for a larger area, e.g. olecranon fossa for elbow. Within a defined area  
401 there are often multiple smaller areas of differing temperature (see Appendix 4), and  
402 as such the selected measurement points may not accurately represent the  
403 temperature of the larger area. In addition, the number of measurement locations  
404 may limit the generalisability of our findings to the whole body. A further limitation is  
405 the variance in room temperature (20-25°C) as this may have affected skin surface  
406 temperature and has not been taken into account in our analyses. The variation of  
407 skin surface temperature of the control was 2.8°C for the sternal notch and 2.2°C for

408 the cubital fossa, and may be due to genuine fluctuation in skin surface temperature  
409 or inconsistent measurement. A further limitation is that this study included a small  
410 number of participants with conditions likely to affect skin surface temperature e.g.  
411 peripheral vascular disease [17]. Participants rested for at least 10 minutes prior to  
412 measurements to minimise the effect of prior physical activity, however other factors  
413 that may influence skin surface temperature and its distribution (e.g. emotional state)  
414 are difficult to ascertain and were not controlled for. Lastly, the non-Gaussian  
415 distribution of the data and correlation between adjacent regions of the body may  
416 limit the appropriateness of the linear regression model.

417 In conclusion, we have found that there is an inverse relationship between skin  
418 surface temperature in healthy volunteers and previously published Buruli ulcer  
419 lesion distribution. However relative skin temperature appears to be only weakly  
420 associated with Buruli lesion distribution, meaning that more than 90% of the  
421 clinically observed non-random distribution is likely to be explained by other factors  
422 such as clothing choice, skin trauma and targeting behaviour by insects.

423

424

425

426

427

## 428 **Acknowledgements**

429 We would like to acknowledge the participants of this study and thank them for  
430 volunteering their time.

## 431 References

- 432 1. Johnson PDR, Stinear T, Small PLC, Pluschke G, Merritt RW, Portaels F, et al. Buruli Ulcer (M.  
433 ulcerans Infection): New Insights, New Hope for Disease Control. PLoS Medicine. 2005;2(4):e108.
- 434 2. MacCallum P, Tolhurst JC, Buckle G, Sissons HA. A new mycobacterial infection in man. J  
435 Pathol Bacteriol. 1948;60(1):93-122.
- 436 3. World Health Organisation. Buruli ulcer (*Mycobacterium ulcerans* infection) Fact Sheet 2017  
437 [updated 02/2017. Available from: <http://www.who.int/mediacentre/factsheets/fs199/en/>.
- 438 4. Carson C, Lavender CJ, Handasyde KA, O'Brien CR, Hewitt N, Johnson PD, et al. Potential  
439 wildlife sentinels for monitoring the endemic spread of human buruli ulcer in South-East Australia.  
440 PLoS Negl Trop Dis. 2014;8(1):e2668.
- 441 5. Loftus MJ, Tay EL, Globan M, Lavender CJ, Crouch SR, Johnson PDR, et al. Epidemiology of  
442 Buruli Ulcer Infections, Victoria, Australia, 2011-2016. Emerg Infect Dis. 2018;24(11):1988-97.
- 443 6. Merritt RW, Walker ED, Small PL, Wallace JR, Johnson PD, Benbow ME, et al. Ecology and  
444 transmission of Buruli ulcer disease: a systematic review. PLoS Negl Trop Dis. 2010;4(12):e911.
- 445 7. Asiedu K, Etuaful S. Socioeconomic implications of Buruli ulcer in Ghana: a three-year  
446 review. Am J Trop Med Hyg. 1998;59(6):1015-22.
- 447 8. Hayman J. Postulated epidemiology of Mycobacterium ulcerans infection. Int J Epidemiol.  
448 1991;20(4):1093-8.
- 449 9. Yerramilli A, Tay EL, Stewardson AJ, Kelley PG, Bishop E, Jenkin GA, et al. The location of  
450 Australian Buruli ulcer lesions-Implications for unravelling disease transmission. PLoS Negl Trop Dis.  
451 2017;11(8):e0005800.
- 452 10. Scollard DM, Adams LB, Gillis TP, Krahenbuhl JL, Truman RW, Williams DL. The Continuing  
453 Challenges of Leprosy. Clinical Microbiology Reviews. 2006;19(2):338-81.
- 454 11. O'Brien DP, Wynne JW, Buultjens AH, Michalski WP, Stinear TP, Friedman ND, et al. Exposure  
455 Risk for Infection and Lack of Human-to-Human Transmission of Mycobacterium ulcerans Disease,  
456 Australia. Emerg Infect Dis. 2017;23(5):837-40.
- 457 12. Lavender CJ, Fyfe JA, Azuolas J, Brown K, Evans RN, Ray LR, et al. Risk of Buruli ulcer and  
458 detection of Mycobacterium ulcerans in mosquitoes in southeastern Australia. PLoS Negl Trop Dis.  
459 2011;5(9):e1305.
- 460 13. Pouillot R, Matias G, Wondje CM, Portaels F, Valin N, Ngos F, et al. Risk factors for buruli  
461 ulcer: a case control study in Cameroon. PLoS Negl Trop Dis. 2007;1(3):e101.
- 462 14. Bratschi MW, Bolz M, Minyem JC, Grize L, Wantong FG, Kerber S, et al. Geographic  
463 distribution, age pattern and sites of lesions in a cohort of Buruli ulcer patients from the Mape Basin  
464 of Cameroon. PLoS Negl Trop Dis. 2013;7(6):e2252.
- 465 15. Boyd SC, Athan E, Friedman ND, Hughes A, Walton A, Callan P, et al. Epidemiology, clinical  
466 features and diagnosis of Mycobacterium ulcerans in an Australian population. Med J Aust.  
467 2012;196(5):341-4.
- 468 16. Hospers IC, Wiersma IC, Dijkstra PU, Stienstra Y, Etuaful S, Ampadu EO, et al. Distribution of  
469 Buruli ulcer lesions over body surface area in a large case series in Ghana: uncovering clues for mode  
470 of transmission. Trans R Soc Trop Med Hyg. 2005;99(3):196-201.
- 471 17. Hildebrandt C, Raschner C, Ammer K. An overview of recent application of medical infrared  
472 thermography in sports medicine in Austria. Sensors (Basel). 2010;10(5):4700-15.
- 473 18. Zhu WP, Xin XR. Study on the distribution pattern of skin temperature in normal Chinese and  
474 detection of the depth of early burn wound by infrared thermography. Ann N Y Acad Sci.  
475 1999;888:300-13.
- 476 19. Kolosovas-Machuca ES, Gonzalez FJ. Distribution of skin temperature in Mexican children.  
477 Skin Res Technol. 2011;17(3):326-31.
- 478 20. Jones BF. A reappraisal of the use of infrared thermal image analysis in medicine. IEEE Trans  
479 Med Imaging. 1998;17(6):1019-27.
- 480 21. Systems F. User's Manual FLIR Ex Series. 2007.

481 **Supporting Information Captions**

482 **S1 Appendix. Skin temperature measurement procedure.** This image displays  
483 the thermal camera screen during measurement. The crosshairs (labelled Sp1)  
484 indicate the point of measurement, and the temperature reading in the top left hand  
485 corner of the image shows the measured temperature of that area.

486 **S2 Appendix. Skin temperature measurement locations.**

487 **S3 Appendix. Study questionnaire.**

488 **S4 Appendix. Selection of participant thermographs.** a) Anterior lower limbs, b)  
489 Anterior upper limbs, c) Posterior lower limbs, d) Posterior upper limbs

490 **S5 Appendix. STROBE Checklist.**
